# Supplementary material for: Phthalates and Perfluorooctanesulfonic Acid in Human Amniotic Fluid: Temporal Trends and Timing of Amniocentesis in Pregnancy
Source: PubMed Central journal article supplement (PMC3385442; doi:10.1289/ehp.1104522), 2012-03-07
Supplement: ehp.1104522.s001.pdf [file ehp.1104522.s001.pdf]

## SUPPLEMENTAL MATERIAL

### Phthalates and Perfluorooctanesulfonic Acid in Human Amniotic Fluid: Temporal Trends and Timing of Amniocentesis in Pregnancy

Morten Søndergaard Jensen, Bent Nørgaard-Pedersen, Gunnar Toft, David M. Hougaard, Jens Peter Bonde, Arieh Cohen, Ane Marie Thulstrup, Richard Ivell, Ravinder Anand-Ivell, Christian H. Lindh and Bo A.G. Jönsson

#### Table of contents

|                                                                               |        |
|-------------------------------------------------------------------------------|--------|
| Table S1 (Details on the environmental pollutants assayed).....               | Page 2 |
| Table S2 (Summary of technical parameters).....                               | Page 3 |
| Figure S1 (Sample chromatograms—Phthalates).....                              | Page 4 |
| Figure S2 (Sample chromatogram—PFOS).....                                     | Page 5 |
| Figure S3 (Non-linearity: 7cx-MMeHP versus year of amniocentesis).....        | Page 6 |
| Figure S4 (Non-linearity: PFOS versus gestational week of amniocentesis)..... | Page 7 |

**Table S1.**

Environmental pollutants assayed in 300 human amniotic fluid samples by liquid chromatography mass spectrometry (LC/MS/MS), Denmark 1980-1996

| Environmental pollutant                | Metabolite                                              | LOD<br>(ng/ml) | Detected | CV<br>(%) | Level<br>(ng/ml) |
|----------------------------------------|---------------------------------------------------------|----------------|----------|-----------|------------------|
| Di(2-ethylhexyl) phthalate<br>[DEHP]   | Mono(2-ethyl-5-carboxypentyl) phthalate<br>[5cx-MEPP]   | 0.05           | Yes      | 16        | 1                |
|                                        | Mono(2-ethyl-5-hydroxyhexyl) phthalate<br>[5OH-MEHP]    | 0.10           | No       |           |                  |
|                                        | Mono(2-ethyl-5-oxohexyl) phthalate<br>[5oxo-MEHP]       | 0.03           | No       |           |                  |
| Diisononyl phthalate<br>[DiNP]         | Mono(4-methyl-7-carboxyheptyl) phthalate<br>[7cx-MMeHP] | 0.02           | Yes      | 12        | 2                |
|                                        | Mono(4-methyl-7-hydroxyloctyl) phthalate<br>[7OH-MMeOP] | 0.01           | No       |           |                  |
|                                        | Mono(4-methyl-7-oxooctyl) phthalate<br>[7oxo-MMeOP]     | 0.02           | No       |           |                  |
| Perfluorooctanesulfonic acid<br>[PFOS] |                                                         | 0.20           | Yes      | 11        | 6                |
| Nicotine                               | Cotinine                                                | 0.20           | Yes      | 9         | 15               |

Abbreviations:

[LOD] Limit of detection at three times the standard deviation of the responses in chemical blanks

[CV] Coefficient of variation (%)

[Level] Pollutant concentration (ng/ml) of CV determination

**Table S2.**

Summary of the technical parameters used in the LC/MS/MS analysis of phthalate metabolites, cotinine, and PFOS in human amniotic fluid. The declustering potentials (Dp) and collision energies (Ce) in volts (V) are tabulated for each analyte and selected reaction monitoring (SRM) transition

| Analyte                                   | SRM transition (m/z) | Dp (V) | Ce (V) |
|-------------------------------------------|----------------------|--------|--------|
| 5cx-MEPP                                  | 307.2→159.2          | -45    | -19    |
| 7cx-MMeHP                                 | 321.1→173.1          | -45    | -23    |
| Cotinine                                  | 177.0→80.1           | 40     | 30     |
| PFOS                                      | 499.0→99.0           | -80    | -110   |
| 7OH-MMeOP                                 | 307.2→121.1          | -45    | -24    |
| 5oxo-MEHP                                 | 291.2→121.1          | -45    | -27    |
| 7oxo-MMeOP                                | 305.2→121.0          | -45    | -23    |
| 5OH-MEHP                                  | 293.2→121.1          | -45    | -22    |
| [ <sup>2</sup> H <sub>4</sub> ]-5cx-MEPP  | 311.2→159.2          | -45    | -19    |
| [ <sup>2</sup> H <sub>4</sub> ]-7cx-MMeHP | 325.2→173.0          | -45    | -23    |
| [ <sup>2</sup> H <sub>3</sub> ]-Cotinine  | 180.0→80.1           | 40     | 30     |
| [ <sup>13</sup> C <sub>4</sub> ]-PFOS     | 503.0→80.0           | -80    | -110   |

Abbreviations: [5cx-MEPP] mono(2-ethyl-5-carboxypentyl) phthalate, [7cx-MMeHP] mono(4-methyl-7-carboxyheptyl) phthalate, [PFOS] perfluorooctanesulfonic acid, [7OH-MMeOP] mono(4-methyl-7-hydroxyoctyl) phthalate, [5oxo-MEHP] mono(2-ethyl-5-oxohexyl) phthalate, [7oxo-MMeOP] mono(4-methyl-7-oxooctyl) phthalate, [5OH-MEHP] mono(2-ethyl-5-hydroxyhexyl) phthalate

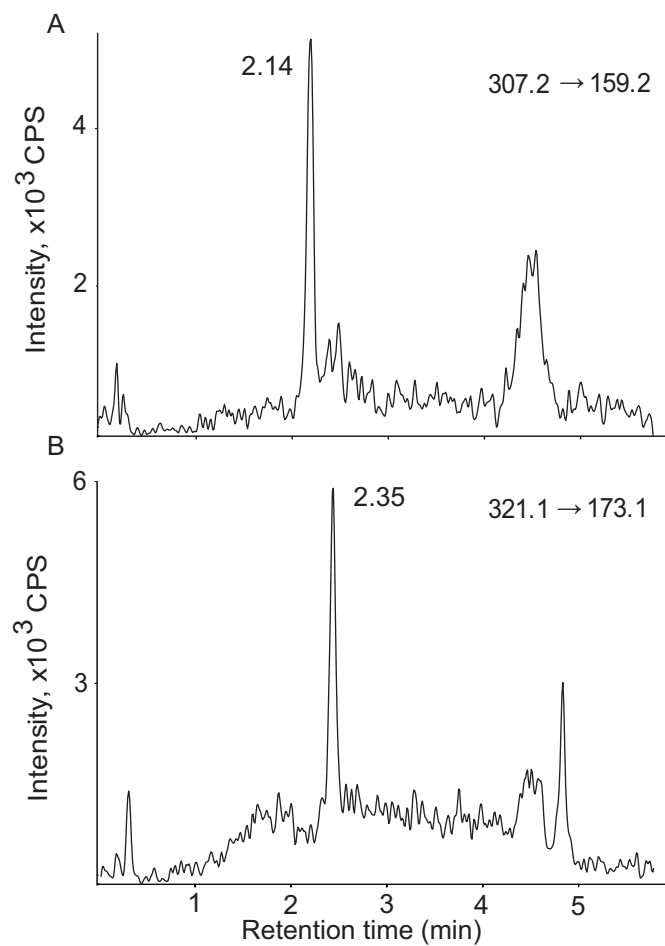

**Figure S1.** LC/MS/MS chromatograms showing (A) an amniotic fluid sample with 0.2 ng/ml of mono(2-ethyl-5-carboxypentyl) phthalate, (B) an amniotic fluid sample with 0.2 ng/ml of mono(4-methyl-7-carboxyheptyl) phthalate. CPS: Counts per second

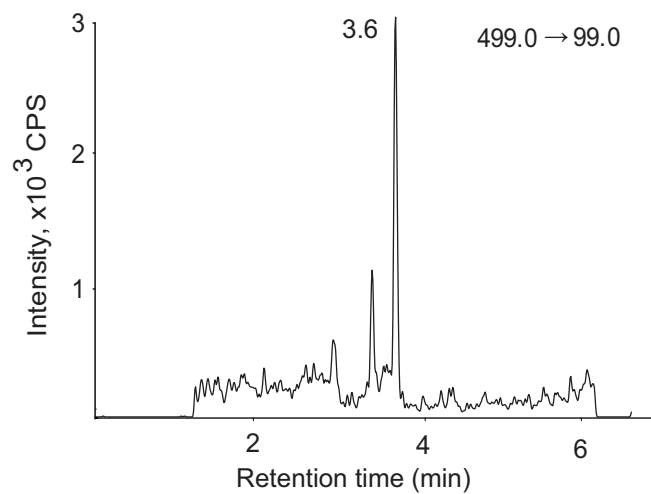

**Figure S2.** LC/MS/MS chromatogram showing an amniotic fluid sample with 0.2 ng/ml of PFOS. CPS: Counts per second

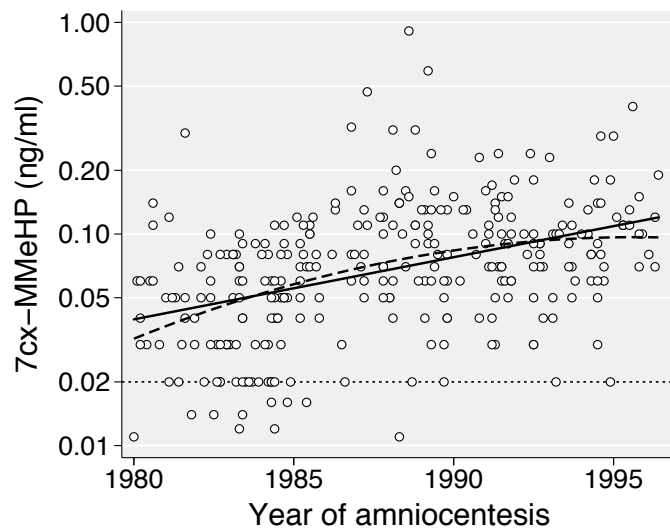

**Figure S3.** Amniotic fluid mono(4-methyl-7-carboxyheptyl) phthalate [7cx-MMeHP] according to year of amniocentesis. Solid line is unadjusted linear regression. Dashed line is unadjusted linear regression with a squared term of year of amniocentesis showing non-linearity ( $P= 0.034$ , testing the null hypothesis of no curvature). Dotted line is limit of detection

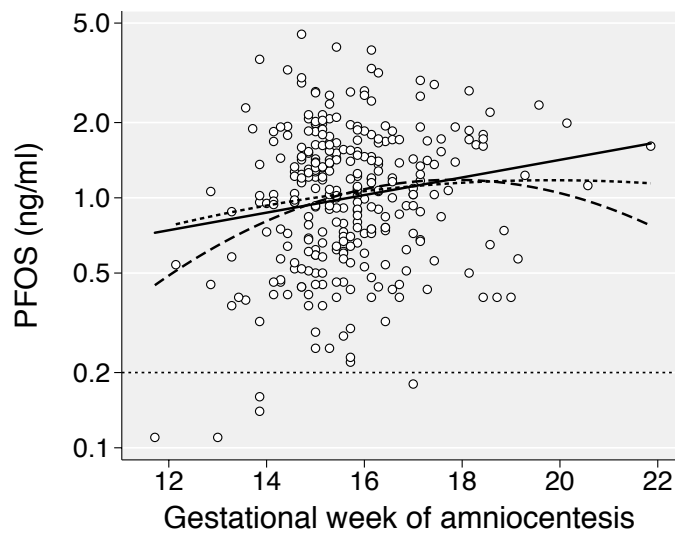

**Figure S4.** Amniotic fluid perfluorooctanesulfonic acid [PFOS] according to gestational week of amniocentesis. Solid line is unadjusted linear regression. Dashed line is unadjusted linear regression with a squared term of gestational week of amniocentesis showing non-linearity (N= 300,  $p= 0.008$ , testing the null hypothesis of no curvature). Short-dashed line is unadjusted linear regression with a squared term of gestational week of amniocentesis and excluding five imputed values below the limit of detection (dotted line) showing non-significant non-linearity (N= 295,  $p= 0.31$ , testing the null hypothesis of no curvature)
